# Supplementary material for: Genetic mapping of anthocyanin accumulation-related genes in pepper fruits using a combination of SLAF-seq and BSA
Source: PLoS One. 2018 Sep 27;13(9):e0204690. doi: 10.1371/journal.pone.0204690 (PMC6160195; doi:10.1371/journal.pone.0204690)
Supplement: S1 Table — (XLSX) [file pone.0204690.s009.xlsx]

## Sheet: Sheet1
S1 Table. Anthocyanin concentrations in parental lines and high- and low-anthocyanin pools.
Samples	mg/100g fresh weight
Z6	0.958432
Z5	0
High-pool
Z10-65	1.46007
Z10-148	1.0867
Z10-162	4.93953
Z10-167	2.34382
Z10-169	2.46128
Z10-170	3.74199
Z10-183	2.60052
Z10-187	1.68603
Z10-188	1.48356
Z10-192	1.50479
Z10-194	7.31278
Z10-206	3.62728
Z10-210	1.08743
Z10-216	1.85744
Z10-229	3.37565
Z10-234	0.905581
Z10-244	1.42876
Z10-258	0.902182
Non-pool
Z10-2	0
Z10-3	0
Z10-6	0
Z10-17	0
Z10-19	0
Z10-22	0
Z10-25	0
Z10-27	0
Z10-30	0
Z10-36	0
Z10-45	0
Z10-50	0
Z10-56	0
Z10-67	0
Z10-69	0
Z10-71	0
Z10-72	0
Z10-78	0
Z10-83	0
Z10-91	0
Z10-96	0
Z10-103	0
Z10-108	0
Z10-109	0
Z10-114	0
Z10-126	0
Z10-133	0
Z10-134	0
Z10-138	0
Z10-154	0
Z10-161	0
Z10-168	0
Z10-191	0
Z10-220	0
Z10-237	0
Z10-246	0
Z10-263	0
